# Supplementary material
Source: PubMed Central journal article supplement (PMC3592061)
Supplement: JCM.02317-12_zjm999092350so1.pdf [file JCM.02317-12_zjm999092350so1.pdf]

1 **Supplementary Table 1. Demographic and risk characteristics of study population**

| <b>Characteristic</b>                           |                                   | <b>N (%)</b> |
|-------------------------------------------------|-----------------------------------|--------------|
| <b>Sex</b>                                      | Male                              | 174 (60)     |
| <b>Vaccine Group</b>                            | 11PCV                             | 135 (47)     |
| <b>Symptoms</b>                                 | Unable to Drink                   | 16 (5.5)     |
|                                                 | Chest Indrawing                   | 156 (53.8)   |
|                                                 | Central Cyanosis                  | 3 (1.0)      |
|                                                 | Fever                             | 32 (11)      |
|                                                 | Hypoxemic (SpO <sub>2</sub> ≤89%) | 33 (11.4)    |
|                                                 | Wheezing                          | 98 (33.8)    |
| <b>WHO Severity Classification of Pneumonia</b> | None                              | 4 (1.4)      |
|                                                 | Non-Severe Pneumonia              | 128 (44.1)   |
|                                                 | Severe Pneumonia                  | 141 (48.6)   |
|                                                 | Very Severe Pneumonia             | 17 (5.9)     |
| <b>Hospitalization Status</b>                   | Hospitalized                      | 228 (78.6)   |
| <b>Outcome of Hospitalized Subjects</b>         | Died                              | 1 (0.3)      |
|                                                 | Discharged Against Medical Advise | 26 (9.0)     |
|                                                 | Discharged                        | 201 (69.3)   |

2

3 **Supplementary Table 2: Coinfections and Single\* Infections Identified by the**  
 4 **PathChip**

|                                | ADV | HMPV | INFA | INFB | INFC | RSVA | RSVB | PIV1 | PIV2 | PIV3 | PIV4 | EV | HRV | CV | CMV | RV | BV |
|--------------------------------|-----|------|------|------|------|------|------|------|------|------|------|----|-----|----|-----|----|----|
| ADV                            | 2   |      |      |      |      |      |      |      |      |      |      |    |     |    |     |    |    |
| HMPV                           |     | 17   |      |      |      |      |      |      |      |      |      |    |     |    |     |    |    |
| INFA                           |     |      | 21   |      |      |      |      |      |      |      |      |    |     |    |     |    |    |
| INFB                           |     |      | 1    | 7    |      |      |      |      |      |      |      |    |     |    |     |    |    |
| INFC                           |     |      |      |      | 0    |      |      |      |      |      |      |    |     |    |     |    |    |
| RSVA                           |     | 1    |      |      |      | 24   |      |      |      |      |      |    |     |    |     |    |    |
| RSVB                           |     | 1    | 1    | 1    |      | 1    | 25   |      |      |      |      |    |     |    |     |    |    |
| PIV1                           |     |      |      |      |      |      |      | 6    |      |      |      |    |     |    |     |    |    |
| PIV2                           |     |      | 1    | 1    |      |      |      |      | 5    |      |      |    |     |    |     |    |    |
| PIV3                           |     |      |      |      |      |      | 1    |      |      | 12   |      |    |     |    |     |    |    |
| PIV4                           |     |      |      |      |      |      |      |      |      |      | 4    |    |     |    |     |    |    |
| EV                             |     | 1    |      |      | 1    | 5    |      |      |      |      |      | 11 |     |    |     |    |    |
| HRV                            |     | 1    | 1    | 1    |      | 1    |      | 3    | 1    | 2    |      | 16 | 29  |    |     |    |    |
| CV                             | 1   |      |      |      |      |      | 2    |      |      | 1    |      | 1  | 4   | 6  |     |    |    |
| CMV                            |     |      |      |      |      |      | 1    | 1    |      |      |      |    |     |    |     | 1  |    |
| Rotavirus                      |     |      |      |      |      |      |      |      |      |      |      |    |     |    |     |    | 1  |
| Bocavirus                      |     | 1    | 1    |      |      |      |      |      |      |      |      |    | 3   | 1  |     |    | 0  |
| Total with positive detections | 3   | 22   | 26   | 10   | 1    | 31   | 29   | 10   | 6    | 15   | 4    | 28 | 36  | 7  | 1   | 1  | 0  |
| Total with double infections   | 1   | 5    | 5    | 3    | 1    | 7    | 4    | 4    | 1    | 3    | 0    | 17 | 7   | 1  | 0   | 0  | 0  |

5 \*Number with single infections for each virus are on the diagonal: ADV = Adenovirus;

6 HMPV = human Metapneumovirus; INF = Influenza; RSV = Respiratory Syncytial virus;

7 PIV = Parainfluenza virus ; EV = Enterovirus; HRV = human Rhinovirus; CV = Coronavirus;

8 CMV = Cytomegalovirus; RV = Rotavirus; BV = Bocavirus

9 **Supplementary Table 3. Specimens where more than two coinfections were detected by the PathChip**

| ID         | ADV | HMPV | RSVA | RSVB | PIV1 | PIV3 | HRV | CMV | HCoV | EV |
|------------|-----|------|------|------|------|------|-----|-----|------|----|
| 701-0-0372 |     |      |      |      |      |      | X   | X   |      | X  |
| 701-0-0741 | X   |      | X    |      |      | X    |     |     |      |    |
| 701-0-1336 |     |      | X    |      |      |      | X   | X   |      |    |
| 701-0-1338 |     |      |      | X    |      | X    |     | X   |      |    |
| 701-0-1655 |     |      | X    |      |      |      | X   |     |      | X  |
| 701-0-1464 |     |      | X    | X    |      |      |     |     |      | X  |
| 701-0-1686 |     |      |      |      |      |      |     | X   | X    | X  |
| 702-0-1100 |     |      |      |      | X    |      |     |     | X    | X  |
| 701-0-1859 |     | X    |      | X    |      |      | X   |     |      |    |
| 701-0-2006 |     |      |      | X    |      |      | X   |     |      | X  |
| 702-0-1721 |     |      | X    |      |      |      | X   |     |      | X  |

ADV = Adenovirus; HMPV=human Metapneumovirus; INF=Influenza; RSV=Respiratory Syncytial virus; PIV= Parainfluenza virus; EV= Enterovirus; HRV = human Rhinovirus; CMV= Cytomegalovirus HCoV = human Coronavirus;
